# Supplementary material
Source: publisher site journal article supplement (https://www.dovepress.com/article/218676)
Supplement: Supplementary file 1 [file get_supplementary_file.php]

**Supplementary information**

**Supplementary Table 1:** Oligonucleotide Microarray Platform Characteristics

| **Chip** | | Affymetrix |
| --- | --- | --- |
| **Array Type** | | HuGene-2_1-st  Version hg19 |
| **Samples** | | Primary versus  Metastatic |
| **Analysis type** | | Gene Level Differential Expression Analysis |
| **Total # of Genes** | | 48226 |
| **# of Differentially Expressed Genes** | | 593 |
| **# of Up-regulated Genes** | | 444 |
| **# of Down-regulated Genes** | | 149 |
| **Algorithm** | One-Way Between-Subject ANOVA (unpaired) | |
| **Filter Criteria** | Fold Change (linear) < -2 or Fold Change (linear) > 2  ANOVA p-value (Condition pair) < 0.05 | |

**Supplementary Table 2:** Microarray Expression Data for KRT7 and MUC1 in 4 Sarcoma Patients with Metastases

|  |  |  |  | **Gene Signal** | | | | | | | |
| --- | --- | --- | --- | --- | --- | --- | --- | --- | --- | --- | --- |
|  |  |  |  | **Patient 1** | | **Patient 2** | | **Patient 3** | | **Patient 4** | |
| **Probe Set ID** | **Gene** | **mRNA Source** | **mRNA Accession** | **Met** | **Sarc** | **Met** | **Sarc** | **Met** | **Sarc** | **Met** | **Sarc** |
| 7955613 | KRT7 | RefSeq | NM_005556 | 4.611 | 3.262 | 7.673 | 4.124 | 8.045 | 3.937 | 4.874 | 2.418 |
| 7920642 | MUC1 | RefSeq | NM_001018016 | 3.678 | 6.593 | 8.146 | 4.733 | 8.169 | 3.416 | 6.777 | 3.626 |

Met: metastatic samples

Sarc: primary sarcoma
